# Supplementary material
Source: PubMed Central journal article supplement (PMC11070150)
Supplement: NIHMS1969903-supplement-Supplementary_material.pdf [file NIHMS1969903-supplement-Supplementary_material.pdf]

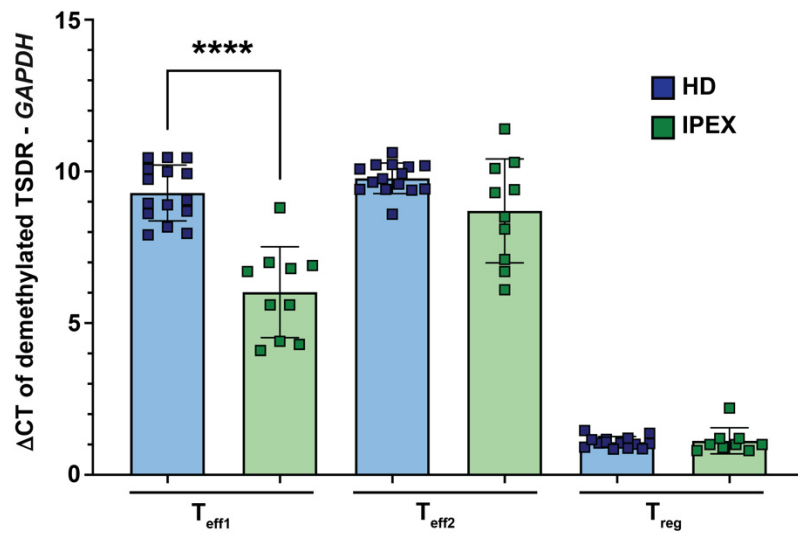

**Fig. S1. Raw data from T<sub>reg</sub>-specific demethylated region (TSDR) demethylation assay.** The data from Fig. 1D are shown as the difference between cycle threshold ( $\Delta$ CT) values of demethylated TSDR and *GAPDH*. TSDR demethylation assay was performed in sorted effector T cell 1 (T<sub>eff1</sub>), effector T cell 2 (T<sub>eff2</sub>), and regulatory T cell (T<sub>reg</sub>) populations. Data are presented as mean  $\pm$  standard deviation (SD). Statistical significance was evaluated using the Mann-Whitney test; \*\*\*\*P < 0.0001.

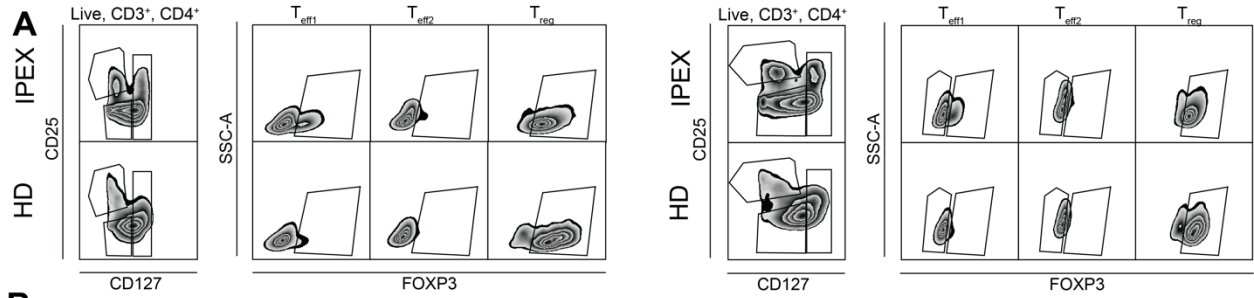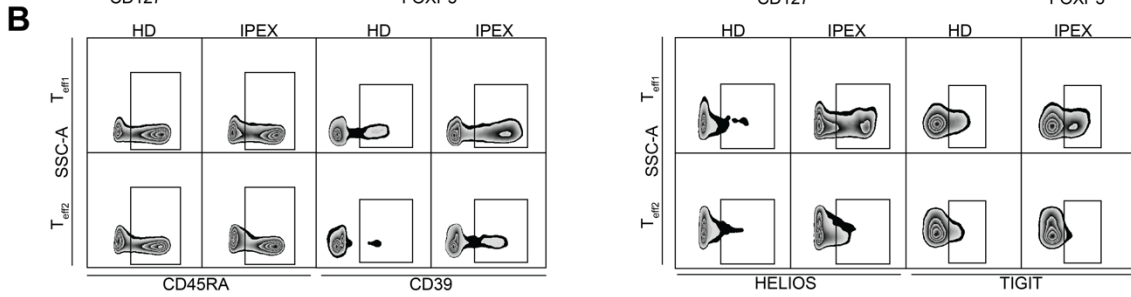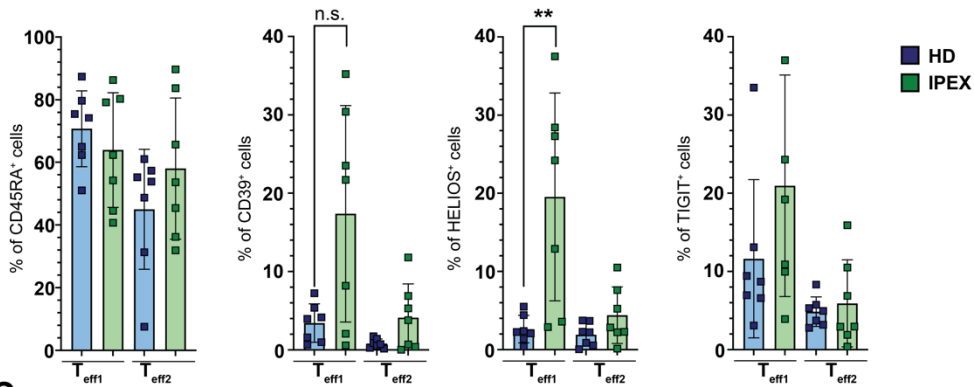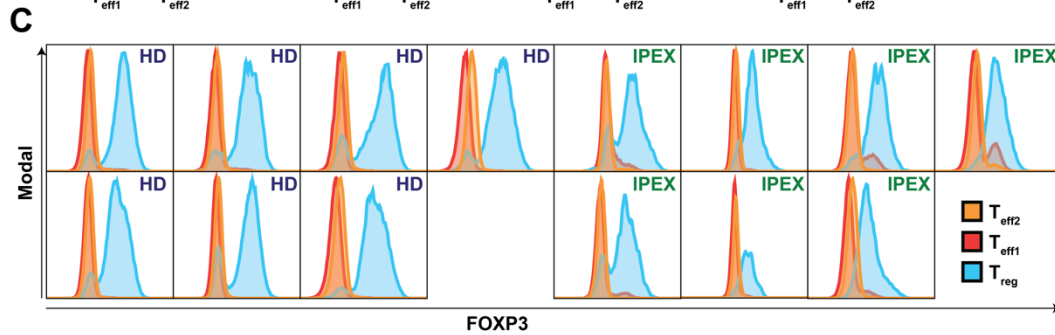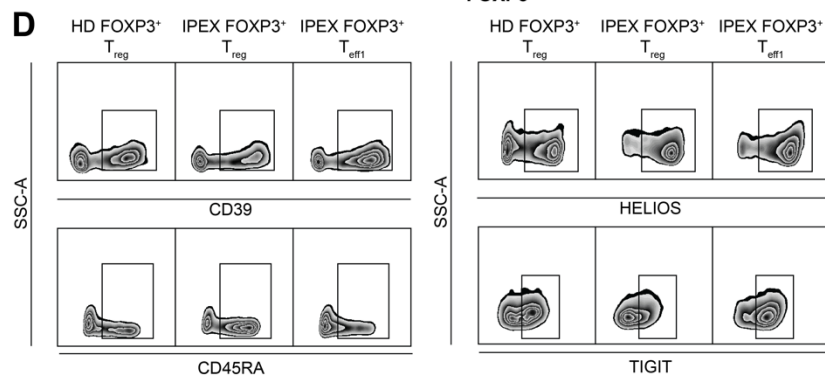

**Fig. S2. Flow cytometry gating strategy for cells isolated from patients with IPEX and HDs analyzed in Fig. 1E and H; FOXP3 expression in patients analyzed in Fig. 1G, and extended phenotypes of  $T_{eff1}$  and  $T_{eff2}$  populations. (A)** Representative plots illustrating the flow cytometry gating strategy of two antibody panels (left and right). The data quantifications and further sub-gating strategies are shown in Fig. 1E and H, fig. S2B and D. SSC-A, side scatter area. **(B)** Extended phenotype analyses of the  $T_{eff1}$  and  $T_{eff2}$  populations. Flow cytometry gating strategy is shown in the top panel, and quantification is shown in the bottom panel. The  $T_{eff1}$  and  $T_{eff2}$  were gated as shown in (A). Statistical significance was evaluated using the Mann-Whitney test;  $**P < 0.01$ . Data are presented as mean  $\pm$  standard deviation (SD). **(C)** FOXP3 expression in patients analyzed in Fig. 1G. Flow cytometry plots showing FOXP3 expression in  $T_{eff1}$  (red),  $T_{eff2}$  (orange), and  $T_{reg}$  (blue) populations from seven patients with IPEX and seven HDs. **(D)** Representative plots illustrating the flow cytometry gating strategy used in Fig. 1H. The  $T_{eff1}$  and  $T_{eff2}$  were gated as shown in (A).

**A** CD45RA expression in clusters antibody derived tag (adt)

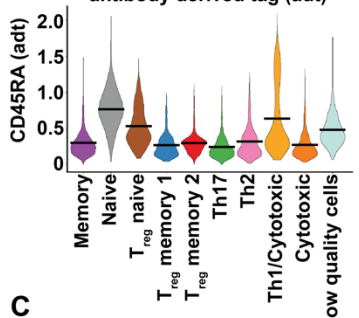

**B**

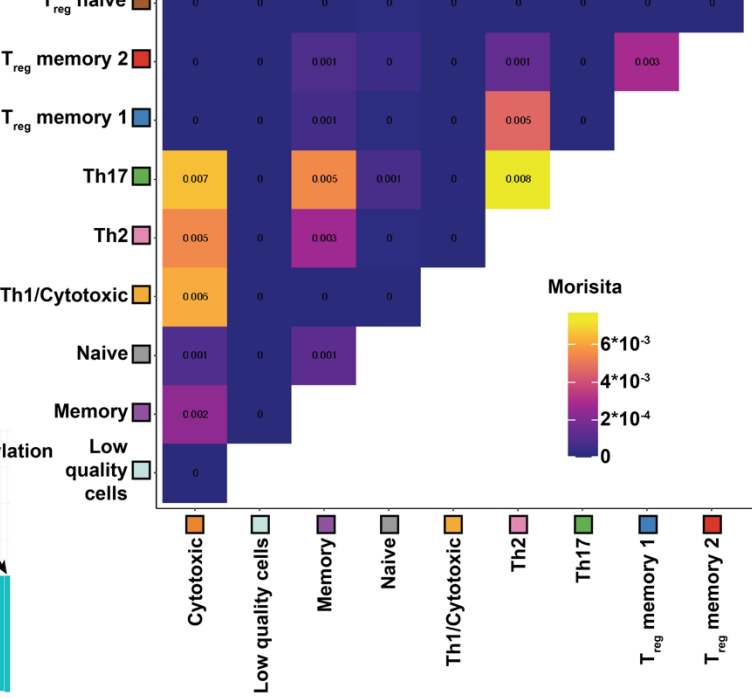

**C**

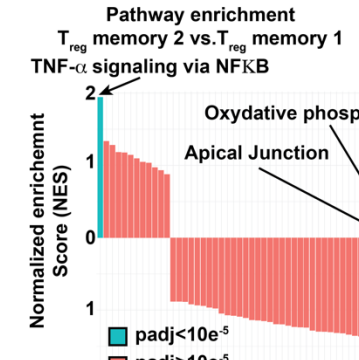

**D**

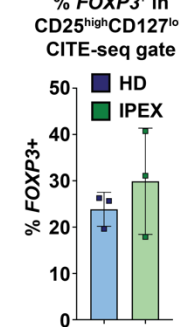

**E**

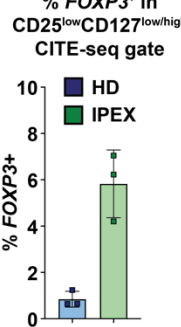

**F**

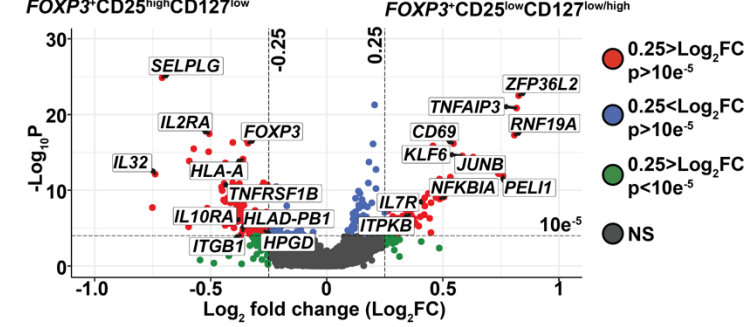

**G**

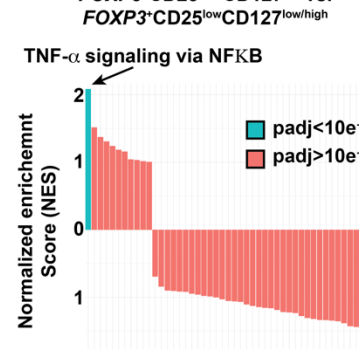

**H**

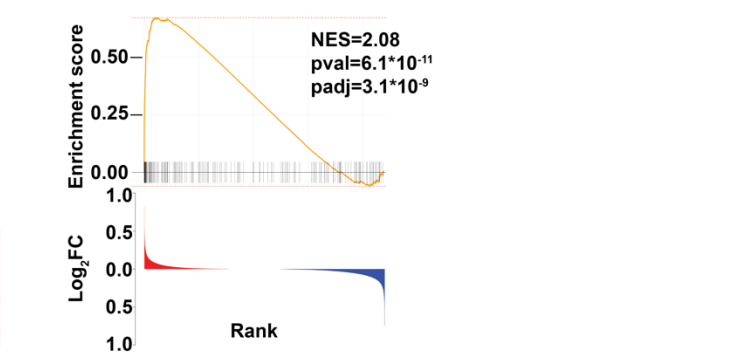

**Fig. S3. Single-cell multi-omic RNA, protein, and T cell receptor (TCR) profiling supplementary data for CD4<sup>+</sup> T cells isolated from patients with IPEX and HDs. (A) Antibody derived tag (ADT)-based analyses of CD45RA expression in T cell populations identified as shown in Fig. 2. (B) Analysis of TCR repertoire overlap between the T cell populations using Morisita overlap. (C) Results of fast gene set enrichment analysis (FGSEA) in T<sub>reg</sub> memory 2 over T<sub>reg</sub> memory 1 populations. (D) Percentage of *FOXP3*<sup>+</sup> (mRNA) cells among CD25<sup>high</sup>CD127<sup>low</sup> [ADT] cells in HDs and patients with IPEX. (E) Percentage of *FOXP3*<sup>+</sup> (mRNA) cells among CD25<sup>low</sup>CD127<sup>low/high</sup> [ADT] cells in HDs and patients with IPEX. (F) Differential expression analyses between *FOXP3*<sup>+</sup> CD25<sup>high</sup>CD127<sup>low</sup> and *FOXP3*<sup>+</sup> CD25<sup>low</sup>CD127<sup>low/high</sup> cells from patients with IPEX. The relevant genes are indicated by a label. P values were calculated using the Wilcoxon rank sum test. The genes with positive fold change are upregulated in *FOXP3*<sup>+</sup> CD25<sup>high</sup>CD127<sup>low</sup> cells compared to *FOXP3*<sup>+</sup> CD25<sup>low</sup>CD127<sup>low/high</sup> cells. (G) Results of FGSEA in *FOXP3*<sup>+</sup> CD25<sup>high</sup>CD127<sup>low</sup> over *FOXP3*<sup>+</sup> CD25<sup>low</sup>CD127<sup>low/high</sup> cells from patients with IPEX. (H) Detail of the tumor necrosis factor (TNF)- $\alpha$  signaling from FGSEA analysis from (G). Genes were ranked based on fold changes, the top panel shows the enrichment score, and the bottom panel shows the fold change of the genes. Data are presented as mean  $\pm$  standard deviation (SD).**

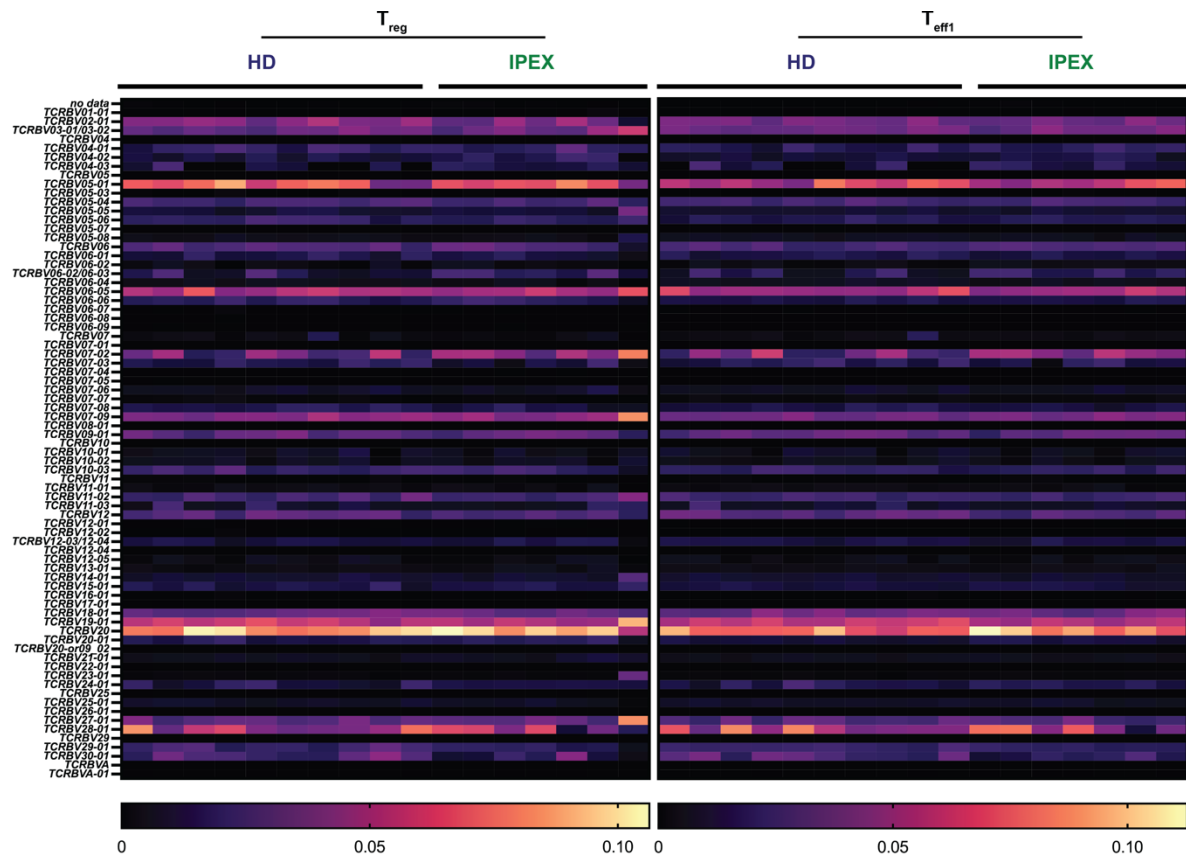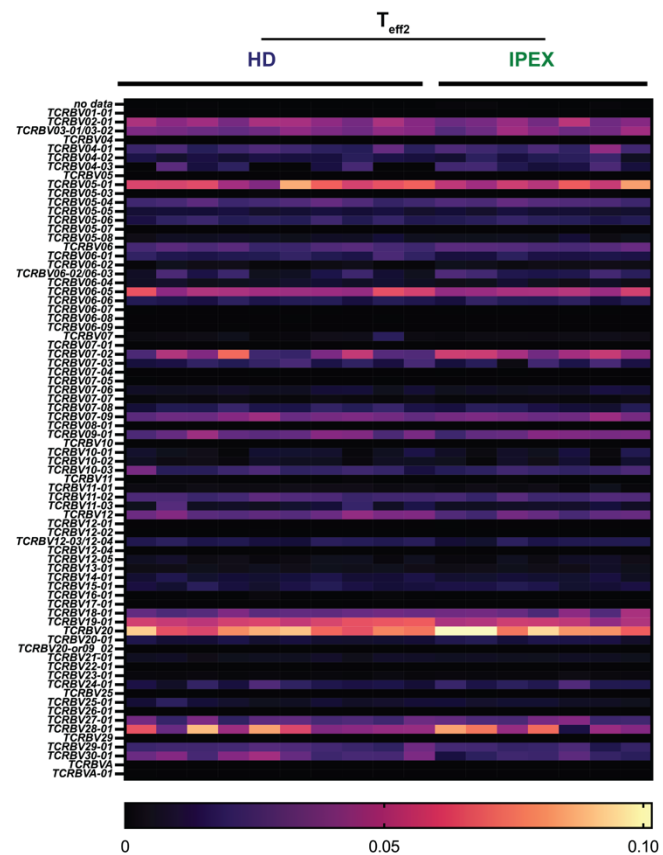

**Fig. S4. *TCRB* gene usage in  $T_{\text{regs}}$ ,  $T_{\text{eff1s}}$ , and  $T_{\text{eff2s}}$  isolated from patients with IPEX and from HDs.**

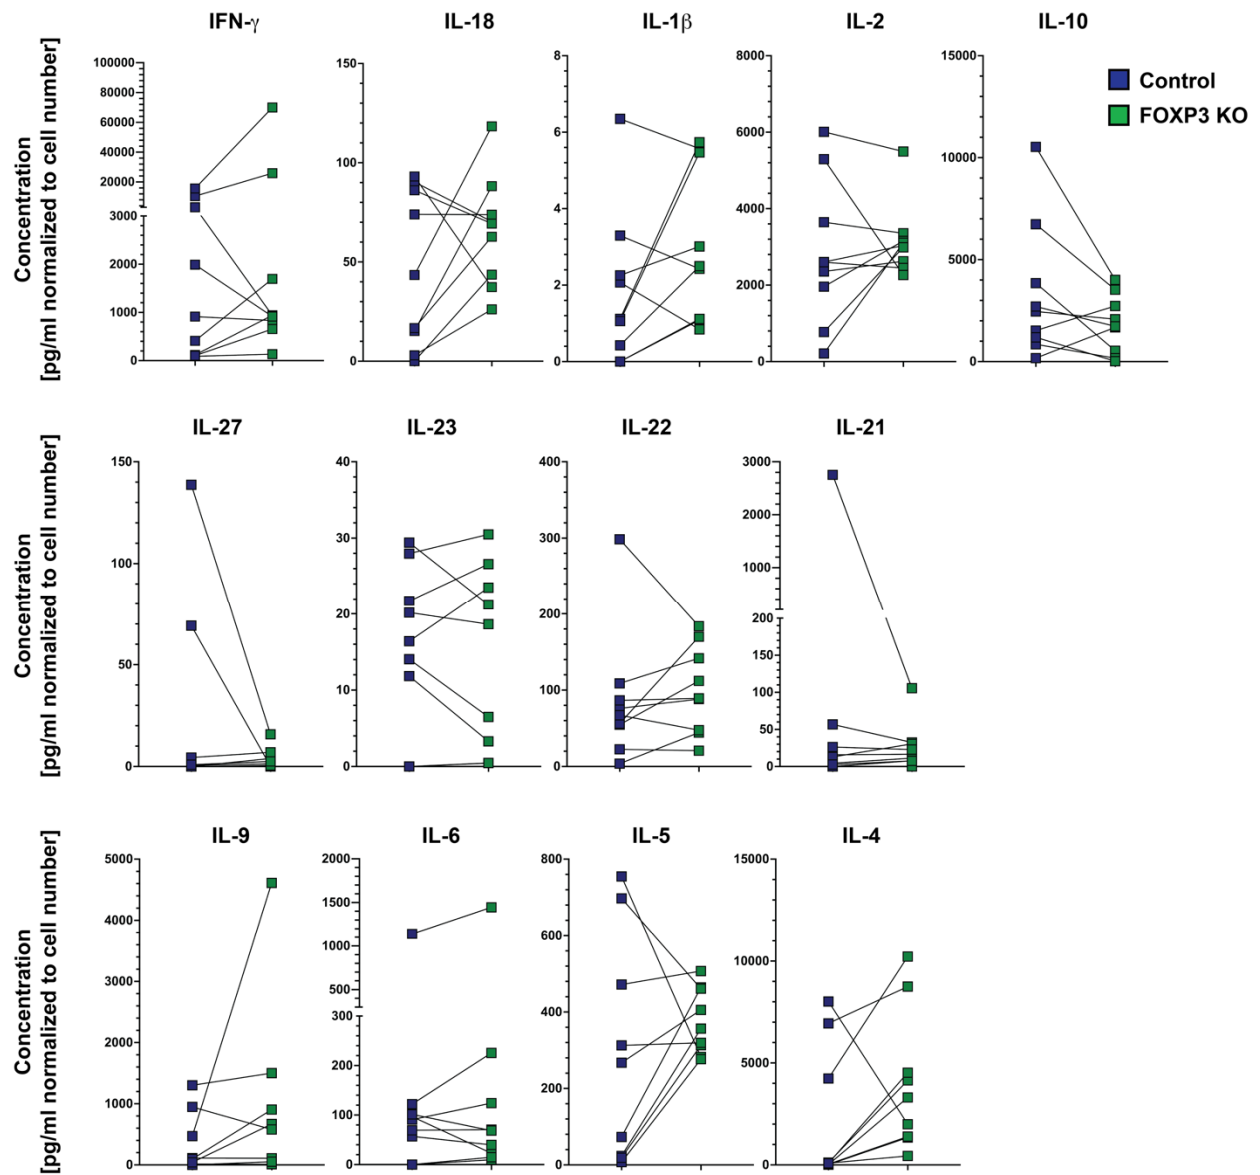

**Fig. S5.** Cytokine production by FOXP3 knockout (KO) and control  $T_{\text{regs}}$  using Luminex in addition to those shown in Fig. 7D. IFN, interferon; IL, interleukin.





**Fig. S6. Comparable expansion and proinflammatory cytokine production in ScrambleGuideRNA/Cas9 and AAV6 treated T<sub>regs</sub> (scramble T<sub>regs</sub>) as in control T<sub>regs</sub> (nucleofected) in response to TCR stimulation in vitro. (A)** Representative flow cytometry plot (left), and quantification (right) of FOXP3 expression in scramble T<sub>regs</sub> and control T<sub>regs</sub> from 8 HDs. FSC-A, forward scatter area. **(B)** T<sub>regs</sub> expansion upon CD3/CD28 stimulation. Cells were counted 3 days post anti-CD3 and anti-CD28 stimulation. The data are plotted as a fold increase of the cell number from day 0. Lines connect control and scramble T<sub>regs</sub> from the same donor. **(C)** Frequency of TSDR-demethylated cells in control and scramble T<sub>regs</sub>. **(D)** Analyses of cytokine production from supernatants of control and scramble T<sub>regs</sub> using a Luminex-based multiplexed assay. GM-CSF, granulocyte-macrophage colony-stimulating factor. The data were analyzed using the Wilcoxon matched-pairs test (A to D); \*p<0.05, \*\*P<0.01. Data are presented as ± standard error of the mean (SEM).

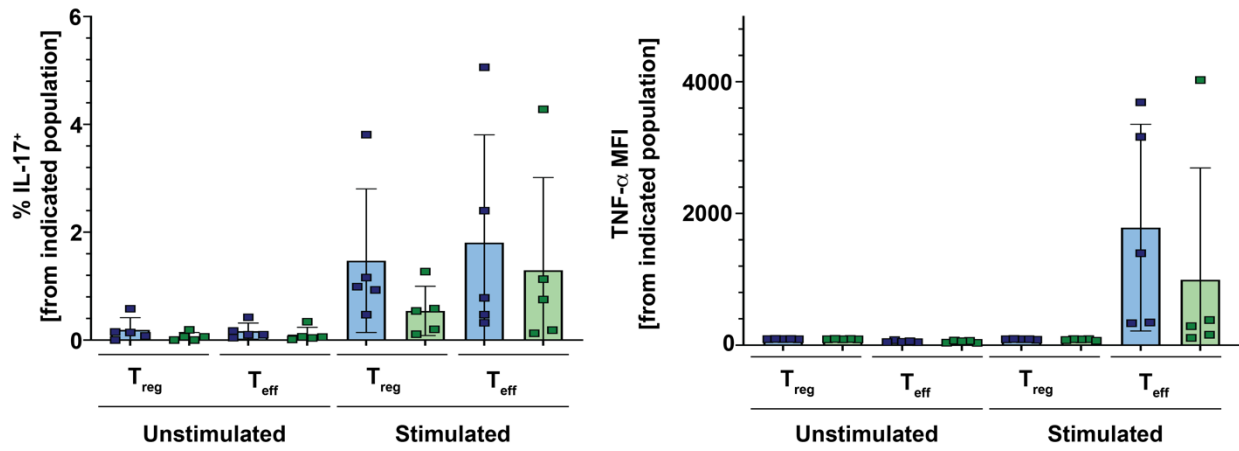

**Fig. S7. Cytokine production by Tregs and Tregs from patients with IPEX and HDs.** The data show non-significant comparisons from Fig. 7E and F. Data are presented as mean  $\pm$  SD.

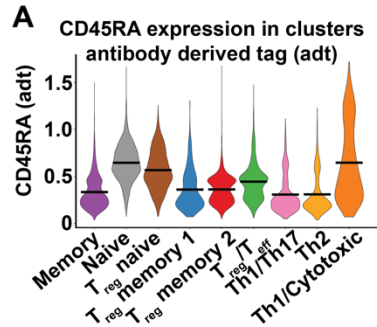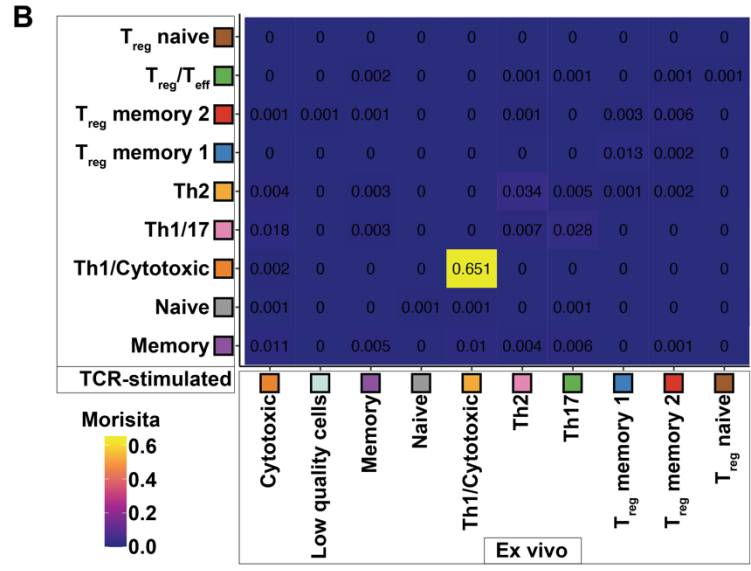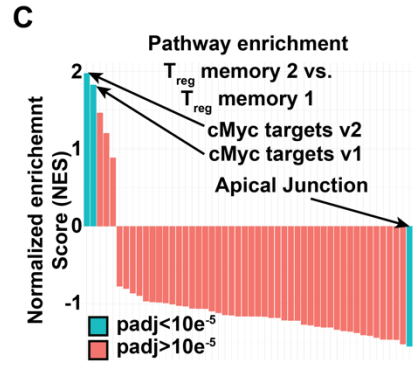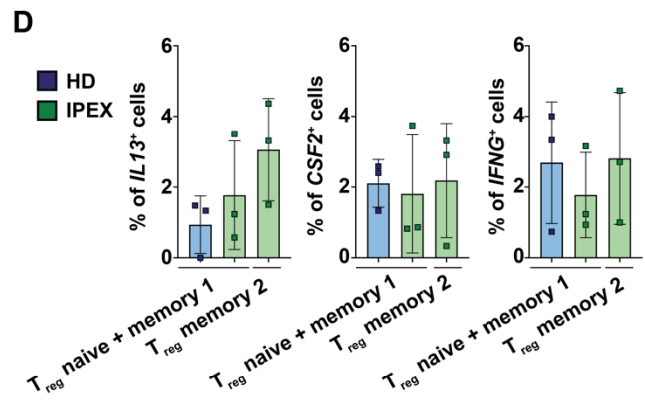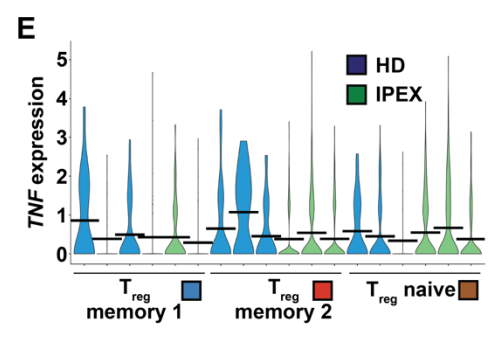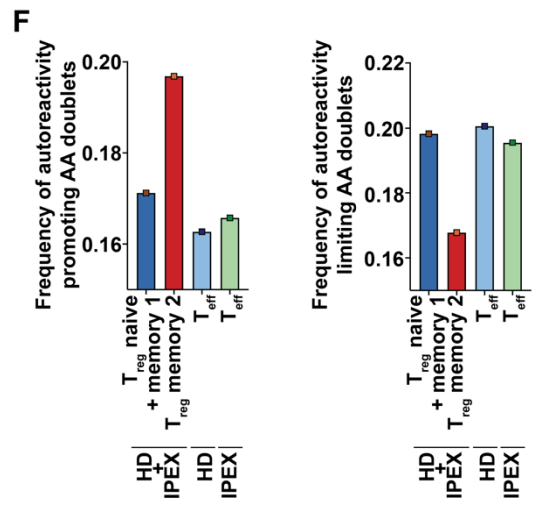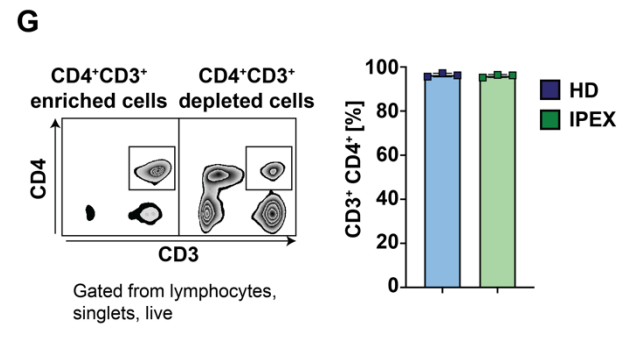

**Fig. S8. Single-cell multi-omics RNA, protein, and TCR profiling supplementary data for TCR-stimulated CD4<sup>+</sup> T cells from patients with IPEX and HDs.** (A) ADT-based analyses of CD45RA expression in T cell populations identified in Fig. 7. (B) Analysis of TCR repertoire overlap between the ex vivo identified T cell populations from Fig. 2 and from TCR stimulated T cell populations identified in Fig. 7 using Morisita overlap. (C) Results of FGSEA analysis in T<sub>reg</sub> memory 2 over T<sub>reg</sub> memory 1. (D) Percentage of *IL13*<sup>+</sup>, *CSF2*<sup>+</sup>, and *IFNG*<sup>+</sup> cells in T<sub>reg</sub> memory 1 and T<sub>reg</sub> naïve, and T<sub>reg</sub> memory 2 populations from samples from HDs and patients with IPEX. (E) Violin plot showing *TNF* expression in T<sub>reg</sub> naïve, T<sub>reg</sub> memory 1, and T<sub>reg</sub> memory 2 populations from samples from HDs and patients with IPEX. The black lines indicate the mean. (F) Frequency of autoreactivity promoting (left) and autoreactivity limiting (right) amino acid (AA) doublets in complementarity determining region 3 beta (CDR3β) in T<sub>reg</sub> memory 1 and T<sub>reg</sub> naïve, and T<sub>reg</sub> memory 2 populations from both HDs and from patients with IPEX, and in T<sub>effs</sub> separately for HDs and samples from patients with IPEX. The T<sub>reg</sub>/T<sub>eff</sub> population was not included among the T<sub>effs</sub>. (G) The purity of CD3<sup>+</sup>CD4<sup>+</sup> cells used for the single-cell multiomics profiling in Fig. 2 and Fig. 8 from 3 patients with IPEX and 3 HDs. (*Left panel*) The representative flow cytometry plots of CD4<sup>+</sup>CD3<sup>+</sup> enriched and depleted peripheral blood mononuclear cells (PBMCs). (*Right panel*) Quantification of the CD4<sup>+</sup>CD3<sup>+</sup> enriched cell purity. Data are presented as mean ± SD.

**Table S1. Donor Characteristics.** # Indicates that mutation was not confirmed by sequencing but two of the mother's children have the same mutation. \*Indicates protein expression in the affected child, or reference to the description of the affected child. NA, not available or applicable.

| Patient/<br>HD | Sex  | Age   | Affected<br>gene | Mutation                      | Protein<br>expression | Previously<br>described<br>individual or<br>mutation | Relation<br>between<br>the subjects<br>in this study                |
|----------------|------|-------|------------------|-------------------------------|-----------------------|------------------------------------------------------|---------------------------------------------------------------------|
| 20             | Male | 1     | FOXP3            | c.340C>T                      | Yes                   | (13)                                                 | NA                                                                  |
| 37             | Male | 29    | FOXP3            | c.1150G>A                     | Yes                   | (13, 33)                                             | NA                                                                  |
| 64             | Male | 3     | FOXP3            | c.1270_1272<br>del/insC       | No                    | (13, 33)                                             | NA                                                                  |
| 77             | Male | 15    | FOXP3            | c.1129C>G                     | Yes                   | (13, 33)                                             | NA                                                                  |
| 122            | Male | 13-14 | FOXP3            | c.1280C>G                     | Yes                   | (13)                                                 | NA                                                                  |
| 136            | Male | 1     | FOXP3            | c.200C>T<br>and c.1042<br>T>G | Yes                   | (13)                                                 | NA                                                                  |
| 139            | Male | 2     | FOXP3            | c.694T>G                      | Yes                   | (13)                                                 | Brother of<br>140                                                   |
| 140            | Male | 4     | FOXP3            | c.694T>G                      | Yes                   | (13)                                                 | Brother of<br>139                                                   |
| 152            | Male | 9     | FOXP3            | c.1222G>A                     | Yes                   | (13)                                                 | Brother of<br>154 and<br>153, Mother<br>is 156,<br>Father is<br>155 |
| 154            | Male | 2     | FOXP3            | c.1222G>A                     | Yes                   | (13)                                                 | Brother of<br>152 and<br>153, Mother<br>is 156,                     |

|                             |        |              |       |                           |      |                 |                                     |
|-----------------------------|--------|--------------|-------|---------------------------|------|-----------------|-------------------------------------|
|                             |        |              |       |                           |      |                 | Father is 155                       |
| 157                         | Male   | 9            | FOXP3 | c.454+4 A>G               | Yes  | (17)            | NA                                  |
| 161                         | Male   | <1           | FOXP3 | c.782_807de<br>linsTGAGCC | Yes  | new<br>mutation | Father is 162, and<br>mother is 163 |
| 184                         | Male   | 7            | FOXP3 | c.1222G>A                 | Yes  | (13)            | NA                                  |
| 187                         | Male   | 15           | FOXP3 | c.1036A>G                 | Yes  | (57)            | NA                                  |
| 188                         | Male   | 3            | FOXP3 | c1087A>G                  | Yes  | (58)            | Mother is 189                       |
| 195                         | Male   | 10           | FOXP3 | c.1190 G>A                | Yes  | (59)            | NA                                  |
| 196                         | Male   | 14           | FOXP3 | c.994 A>G                 | Yes  | (14)            | NA                                  |
| 201                         | Male   | 17           | FOXP3 | c.1222 G>A                | Yes  | (13)            | NA                                  |
| Carrier<br>Mother<br>156    | Female | NA,<br>adult | FOXP3 | p.1222G>A#                | Yes* | (13)*           | Mother of<br>152, 153,<br>and 154   |
| Carrier<br>Mother 1         | Female | NA,<br>adult | FOXP3 | p.A384T                   | Yes* | (60), (30)*     | NA                                  |
| Carrier<br>Mother 2         | Female | NA,<br>adult | FOXP3 | p.F373A                   | Yes* | (60), (30)*     | NA                                  |
| Carrier<br>Mother 3         | Female | NA,<br>adult | FOXP3 | p.A384T                   | Yes* | (60), (30)*     | NA                                  |
| Carrier<br>Mother 4         | Female | NA,<br>adult | FOXP3 | IVS8+4A>G                 | NA   | (39)            | NA                                  |
| Carrier<br>Mother 5         | Female | NA,<br>adult | FOXP3 | c.2T>C                    | No*  | (60), (30)*     | NA                                  |
| Carrier<br>Mother 6         | Female | NA,<br>adult | FOXP3 | c.2T>C                    | No*  | (60), (30)*     | NA                                  |
| Carrier<br>mother<br>163    | Female | NA,<br>adult | FOXP3 | c.782_807de<br>linsTGAGCC | Yes  | NA              | Mother of<br>161                    |
| Carrier<br>Mother<br>IPEX01 | Female | NA,<br>adult | FOXP3 | V408M                     | Yes  | (16)*           | NA                                  |

|                     |        |           |      |                                            |     |               |                                                              |
|---------------------|--------|-----------|------|--------------------------------------------|-----|---------------|--------------------------------------------------------------|
| Mother 189          | Female | 34        | HD   | FOXP3 wild type form                       | Yes | NA            | Mother of 188                                                |
| AIRE07              | Female | 8         | AIRE | c.967_979del13 and c.769C>T                | NA  | (8, 61), (9)* | NA                                                           |
| AIRE09              | Male   | 13        | AIRE | c.967_979del13 homozygote                  | NA  | (8), (9)*     | NA                                                           |
| AIRE11              | Female | 17        | AIRE | c.967_979del13 homozygote                  | NA  | (8), (9)*     | NA                                                           |
| 63                  | Female | 14        | AIRE | AIRE c.967_979del confirmed for one allele | NA  | (8)           | NA                                                           |
| FAT_AIRE07          | Male   | NA, adult | NA   | NA                                         | NA  | (9)*          | Father of patient AIRE07                                     |
| MOT_AIRE07          | Female | NA, adult | NA   | NA                                         | NA  | (9)*          | Mother of patient AIRE07                                     |
| MOT_AIRE11          | Female | NA, adult | NA   | NA                                         | NA  | (9)*          | Mother of patient AIRE11                                     |
| MOT_AIRE12          | Female | NA, adult | NA   | NA                                         | NA  | NA            | NA                                                           |
| 153                 | Male   | 7         | HD   | WT FOXP3                                   | NA  | NA            | Healthy brother of 152 and 154, Mother is 156, Father is 155 |
| Pediatric donor 1   | NA     | 10        | HD   | NA                                         | NA  | NA            | NA                                                           |
| Pediatric donor 2   | NA     | 11        | HD   | NA                                         | NA  | NA            | NA                                                           |
| Pediatric donor 202 | Male   | 14        | HD   | NA                                         | NA  | NA            | NA                                                           |
| 208                 | Male   | 23        | HD   | NA                                         | NA  | NA            | NA                                                           |



|                                                      |        |              |    |    |    |    |                               |
|------------------------------------------------------|--------|--------------|----|----|----|----|-------------------------------|
| 155                                                  | Male   | NA,<br>adult | HD | NA | NA | NA | Father of<br>152, 153,<br>154 |
| 162                                                  | Male   | NA,<br>adult | HD | NA | NA | NA | Father of<br>161              |
| HD01                                                 | Male   | NA,<br>adult | HD | NA | NA | NA | NA                            |
| 27<br>healthy<br>donors<br>Stanford<br>blood<br>bank | Female | NA,<br>adult | HD | NA | NA | NA | NA                            |
| 5 healthy<br>donors<br>Stanford<br>blood<br>bank     | NA     | NA,<br>adult | HD | NA | NA | NA | NA                            |
| 37<br>healthy<br>donors<br>Stanford<br>blood<br>bank | Male   | NA,<br>adult | HD | NA | NA | NA | NA                            |

**Table S2. List of antibodies.**

| Antigen/<br>reagent             | Clone/details            | Conjugate, dilution, and catalog number                                                                                                                                                            | Company                      |
|---------------------------------|--------------------------|----------------------------------------------------------------------------------------------------------------------------------------------------------------------------------------------------|------------------------------|
| CD3                             | OKT3, UCHT1              | PE - dilution 1:50, catalog num. 317308;<br>BB700 - dilution 1:50, catalog num. 566818;<br>PerCP-Cy5.5 - dilution 1:50, catalog num.<br>317336; BUV 496 - dilution 1:50, catalog<br>num. BDB612940 | BioLegend, BD<br>Biosciences |
| CD4                             | RPA-T4                   | a700 - dilution 1:25 or 1:50, catalog num.<br>557922; APC-Cy7 - dilution 1:50, catalog num.<br>300518; BUV395 - dilution 1:50, catalog num.<br>BDB564724                                           | BioLegend, BD<br>Biosciences |
| CD14                            | 63D3                     | PB - dilution 1:50, catalog num. 367122                                                                                                                                                            | BioLegend                    |
| CD127                           | A019D5                   | PE/Cy7 - dilution 1:50, catalog num. 351320;<br>BV421- dilution 1:20, catalog num. 351310;<br>A700 - dilution 1:25, catalog num. 351344                                                            | BioLegend                    |
| CD25                            | 2A3                      | APC - dilution 1:25, catalog num. BDB340939;<br>FITC - dilution 1:25 or 1:20, catalog num.<br>BDB347643; BV605 - 1:50, catalog num.<br>BDB562660; B650 - dilution 1:25, catalog<br>num. BDB740634  | BD Biosciences               |
| FOXP3+C7                        | 259D, 150D               | a488 - dilution 1:20 or 1:25, catalog num.<br>320212; PE - dilution 1:25 or 1:20, catalog<br>num. 320008; a647 - dilution 1:25 and 1:20,<br>catalog num. 320014 and 320214                         | BioLegend                    |
| NGFR                            | C40-1457                 | PE-CF594 - dilution 1:50, catalog num.<br>BDB563452                                                                                                                                                | BD Biosciences               |
| HLA-A2                          | BB7.2                    | APC - dilution 1:50, catalog num. 343308                                                                                                                                                           | BioLegend                    |
| CTLA-4                          | BNI3, L3D10              | BV421 - dilution 1:25, catalog number<br>369605; APC - dilution 1:20, catalog num.<br>349908; BV711 - dilution 1:20, catalog num.<br>369632                                                        | BioLegend                    |
| Live/Dead<br>Fixable<br>Aqua    | Cell Stain Kit           | Dilution 1:50, catalog num. L34966                                                                                                                                                                 | Invitrogen                   |
| Hoechst<br>33258                | Staining Dye<br>Solution | Dilution 1:10000, catalog num ab228550                                                                                                                                                             | Abcam                        |
| LIVE/DEA<br>D Fixable<br>Violet | Cell Stain Kit           | Dilution 100x and 50x, catalog num. L34955                                                                                                                                                         | Invitrogen                   |

|                                  |                |                                                                                              |                        |
|----------------------------------|----------------|----------------------------------------------------------------------------------------------|------------------------|
| FcR blocking reagent             | human          | Dilution 1:20 and 1:25, catalog num. 130-059-901                                             | Miltenyi Biotec Inc    |
| CD39                             | MZ18-23C8      | PE - dilution 1:20, catalog num. 130-118-540                                                 | Miltenyi Biotec Inc    |
| CD45RA                           | HI100          | BV510 - dilution 1:50, catalog num. 304142                                                   | BioLegend              |
| Zombie Red Fixable Viability Kit | Cell Stain Kit | Dilution 1:25, catalog num 423110                                                            | BioLegend              |
| TIGIT                            | MBSA43, VSTM3  | PE-Cy7 - dilution 1:20, catalog num. 50-112-9029; BV785 - dilution 1:25, catalog num. 372736 | eBioscience, BioLegend |
| HELIOS                           | 22F6           | PE - dilution 1:20, catalog num. 137216; PE/Dazzle 594 - dilution 1:20, catalog num. 137232  | BioLegend              |
| IL-13                            | JES10-5A2      | PE-Cy7 - dilution 1:20, catalog num. 501914                                                  | BioLegend              |
| TNF- $\alpha$                    | MAB11          | a488 - dilution 1:20, catalog num. 502915                                                    | BioLegend              |
| IL-17A                           | BL168          | BV785 - dilution 1:20, catalog num. 512338                                                   | BioLegend              |
| GM-CSF                           | BVD2-21C11     | PE - dilution 1:20, catalog num. 502306                                                      | BioLegend              |
| anti-human CD25                  | BC96           | TotalSeq-C0085 - dilution 1:100 (0.5ug per 100ul), catalog num. 302649                       | BioLegend              |
| anti-human CD45RA                | HI100          | TotalSeq-C0063 - dilution 1:200 (0.25ug per 100ul), catalog num. 304163                      | BioLegend              |
| anti-human CD127                 | A019D5         | TotalSeq-C0390 - dilution 1:100 (0.5 ug per 100ul), catalog num. 351356                      | BioLegend              |
| anti-human Hashtag 2             | LNH-94; 2M2    | TotalSeq-C0252 - dilution 1:50 (1ug per 100ul) catalog num. 394663                           | BioLegend              |
| anti-human Hashtag 1             | LNH-94; 2M2    | TotalSeq-C0251 - dilution 1:50 (1ug per 100ul), catalog num. 394661                          | BioLegend              |

**Data file S1.** List of genes from differential gene expression analysis between ex vivo T<sub>reg</sub> memory 2 and T<sub>reg</sub> memory 1 populations.

**Data file S2.** List of genes from differential gene expression analysis between IPEXs *FOXP3*<sup>+</sup>CD25<sup>high</sup>CD127<sup>low</sup> and *FOXP3*<sup>+</sup>CD25<sup>low</sup>CD127<sup>low/high</sup> cells.

**Data file S3.** List of genes from differential gene expression analysis between TCR-stimulated T<sub>reg</sub> memory 2 and T<sub>reg</sub> memory 1 populations.

**Data file S4.** Raw, individual-level data for experiments.
